# Supplementary material for: Systems biology analysis reveals NFAT5 as a novel biomarker and master regulator of inflammatory breast cancer
Source: PubMed Central journal article supplement (PMC4438533; doi:10.1186/s12967-015-0492-2), 2015-05-01

## Kaplan-Meier Plots

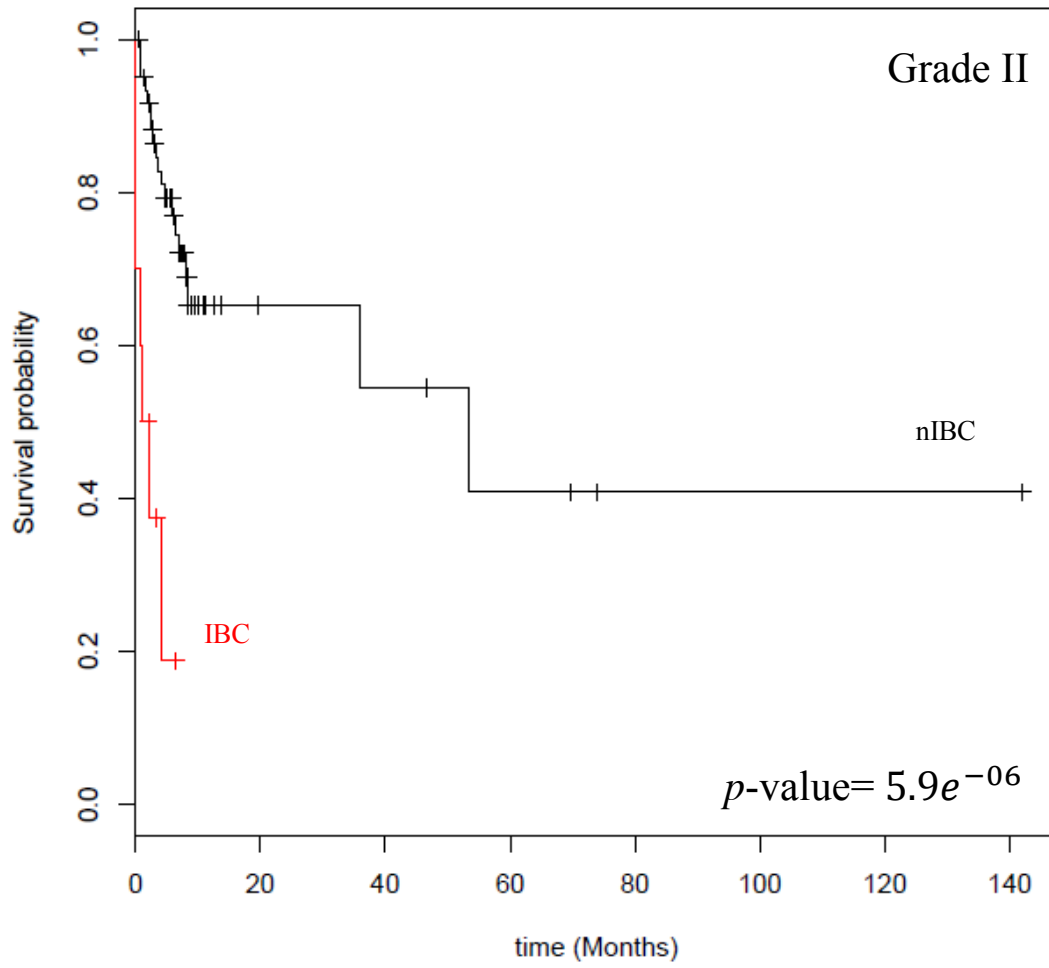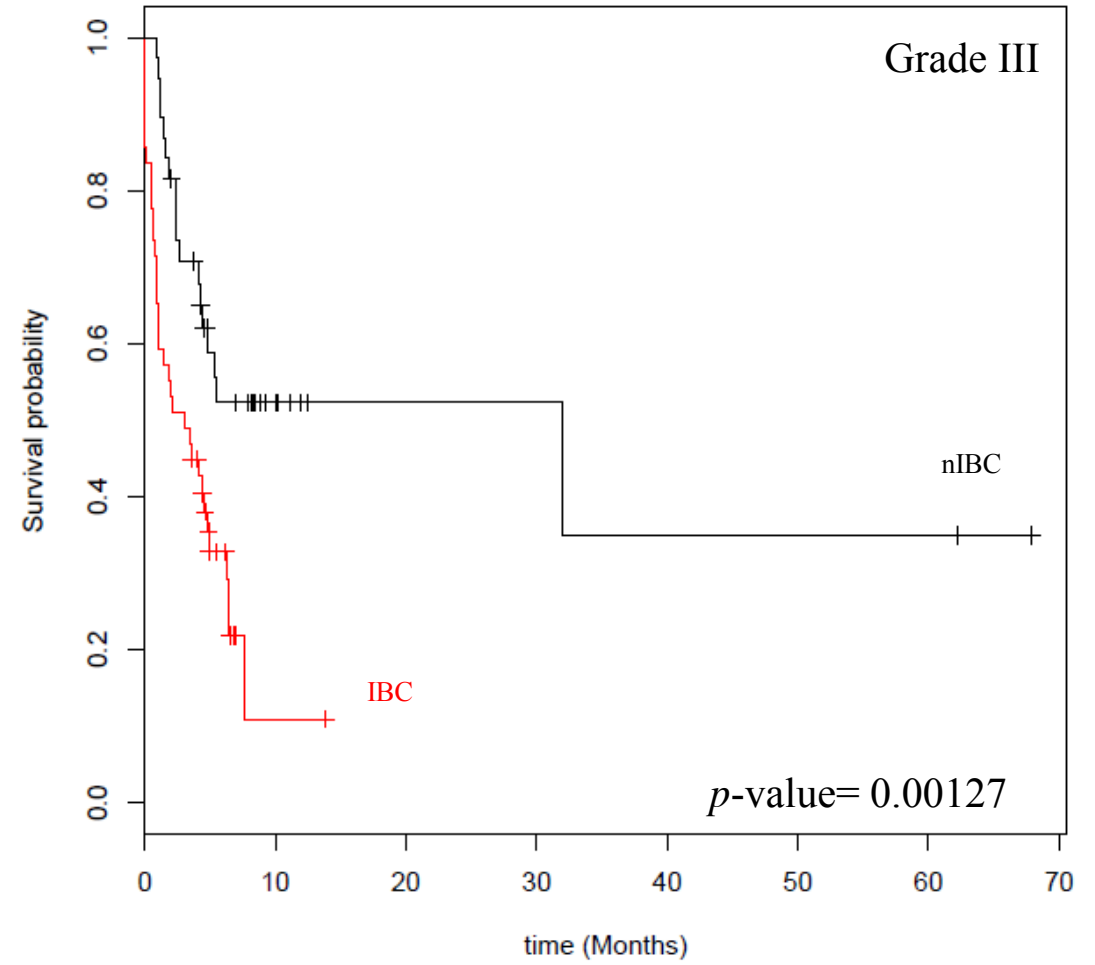

Supplement: 12967_2015_492_MOESM3_ESM.pdf [file 12967_2015_492_MOESM3_ESM.pdf]
